# Supplementary material
Source: PubMed Central journal article supplement (PMC3810419)
Supplement: NIHMS355959-supplement-Supplementary_Tables.pdf [file NIHMS355959-supplement-Supplementary_Tables.pdf]

**(SUPPLEMENTARY TABLE 1) Study Subjects**

| <u>STUDY POPULATION</u>                  | <u>CD cases</u> | <u>controls</u> |
|------------------------------------------|-----------------|-----------------|
| <b><u>Primary dataset:</u></b>           |                 |                 |
| Samples Received                         |                 |                 |
| Recruited by MAAIS                       | 227             | 201             |
| Subjects not included                    |                 |                 |
| < 15% African Ancestry                   | 0               | 1               |
| Final primary dataset                    |                 |                 |
| Study Population                         | 227             | 200             |
| <b><u>Secondary dataset:</u></b>         |                 |                 |
| Samples Received                         |                 |                 |
| Univ. of Chicago                         | 66              | 0               |
| Med Coll of Wisconsin                    | 59              | 0               |
| Duke University                          | 12              | 0               |
| IBDGC (22 UC and IC cases also received) | 14              | 7               |
| Balt. Asthma Controls                    | 0               | 152             |
| Total Samples cohort 2 received          | 151             | 159             |
| Subjects not included                    |                 |                 |
| ≤ 15% African Ancestry                   | 2               | 1               |
| Canadian IBDGC study subjects            | 12              | 4               |
| Poor genotyping                          | 10              | 0               |
| Final secondary dataset                  |                 |                 |
| Study Population                         | 127             | 154             |

**(SUPPLEMENTARY TABLE 2) Characteristics of 21 SNPs genotyped (combined dataset)**

| Gene                                | SNP no.                        | Nucleotide change           | Location         | Minor allele frequency (in controls) | Genotype call rate | HWE <i>P</i> | HapMap CEU           | HapMap YRI           |
|-------------------------------------|--------------------------------|-----------------------------|------------------|--------------------------------------|--------------------|--------------|----------------------|----------------------|
| <b>Candidate SNPs</b>               |                                |                             |                  |                                      |                    |              |                      |                      |
| <i>NOD2</i>                         | Rs2066847<br>1007fs<br>(SNP13) | 3020insC<br>[-/C]           | Exon11           | Allele “+”: 0.1%                     | 99.2%              | 0.98         | -: 100%<br>+: 0%     | -: 100%<br>+: 0%     |
| <i>NOD2</i>                         | Rs2066845<br>G908R<br>(SNP12)  | C/G                         | Exon8            | Allele “C”: 0.3%                     | 98.9%              | 0.96         | C: 1.7%<br>G: 98.3%  | C: 0%<br>G: 100%     |
| <i>NOD2</i>                         | Rs2066844<br>R702W<br>(SNP8)   | C/T                         | Exon4            | Allele “T”: 0.6%                     | 95.5%              | 0.92         | C: 89%<br>T: 11%     | C: 100%<br>T: 0%     |
| <i>NOD2</i>                         | Rs2066842<br>P268S<br>(SNP5)   | C/T<br>(ancestral allele C) | Exon4            | Allele “T”: 4.4%                     | 98.9%              | 0.38         | C: 63.8%<br>T: 36.2% | C: 100%<br>T: 0%     |
| <i>NOD2</i>                         | rs35285618<br>R708H            | A/G                         | Exon4            | Allele “A”: 1.4%                     | 95.5%              | 0.80         | --                   | --                   |
| <i>NOD2</i>                         | rs5743279<br>R790Q             | A/G<br>(ancestral allele G) | Exon4            | Allele “A”: 4.0%                     | 95%                | 0.04         | A: 0%<br>G: 100%     | A: 2.5%<br>G: 97.5%  |
| <i>NOD2</i>                         | rs5743278<br>A725G             | C/G<br>(ancestral allele C) | Exon4            | Allele “G”: 4.4%                     | 95.5%              | 0.63         | C: 100%<br>G: 0%     | C: 91.7%<br>G: 8.3%  |
| <i>ATG16L1</i>                      | Rs2241880<br>Thr300Ala         | A/G<br>(ancestral allele T) | Exon8            | Allele “G”:29.3%                     | 98.6%              | 0.72         | T: 45.8%<br>C: 54.2% | T: 72.5%<br>C: 27.5% |
| <i>IBD5_OCTN1</i><br><i>SLC22A4</i> | Rs1050152<br>Leu503Phe         | C/T<br>(ancestral allele C) | Exon9            | Allele “T”: 7.6%                     | 98.9%              | 0.44         | C: 54.2%<br>T: 45.8% | C: 100%<br>T: 0.0%   |
| <i>IBD5_OCTN2</i><br><i>SLC22A5</i> | Rs2631367                      | C/G<br>(ancestral allele C) | Promoter<br>-207 | Allele “C”:35.7%                     | 97.9%              | 0.07         | C: 51.7%<br>G: 48.3% | C: 60.4%<br>G: 39.6% |
| <i>IBD5_OCTN2</i><br><i>IGR2230</i> | Rs17622208                     | A/G<br>(ancestral allele G) | Intron2          | Allele “A”:18.7%                     | 97.6%              | 0.15         | A: 50.8%<br>G: 49.2% | A: 10%<br>G: 90%     |
| <i>IBD5_IGR2198</i>                 | Rs11739135                     | C/G<br>(ancestral allele G) | 3'-UTR           | Allele “G”:11.3%                     | 96.6%              | 0.46         | C: 42.5%<br>G: 57.5% | G: 98.3%<br>C: 1.7%  |
| <i>IBD5_IGR2096</i>                 | Rs12521868                     | G/T                         | intergenic       | Allele “T”:11.7%                     | 97.1%              | 0.16         | G: 55%               | G: 99.2%             |

|              |            |                      |            |                   |       |      |          |          |
|--------------|------------|----------------------|------------|-------------------|-------|------|----------|----------|
|              |            | (ancestral allele G) |            |                   |       |      | T: 45%   | T: 0.8%  |
| <i>IL23R</i> | Rs7517847  | G/T                  | Intron6    | Allele "G":21.4%  | 98.6% | 0.20 | G: 50%   | G: 11.7% |
|              |            | (ancestral allele T) |            |                   |       |      | T: 50%   | T: 88.3% |
| <i>IL23R</i> | Rs2201841  | C/T                  | Intron7    | Allele "G": 13.8% | 98.3% | 0.55 | C: 27.5% | C: 10.8% |
|              |            |                      |            |                   |       |      | T: 72.5% | T: 89.2% |
| <i>IL23R</i> | Rs11209026 | A/G                  | Exon9      | Allele "A": 2.56% | 98.6% | 0.62 | A: 6.8%  | A: 1.7%  |
|              | Arg381Gln  | (ancestral allele G) |            |                   |       |      | G: 93.2% | G: 98.3% |
| <i>IL23R</i> | Rs1495965  | A/G                  | intergenic | Allele "G": 44.5% | 98.3% | 0.30 | A: 58.8% | A: 53.3% |
|              |            | (ancestral allele G) |            |                   |       |      | G: 41.2% | G: 46.7% |
| <i>IL23R</i> | Rs10889677 | A/C                  | 3'-UTR     | Allele "A": 14.7% | 98.2% | 0.81 | A: 27.5% | A: 10%   |
|              |            | (ancestral allele C) |            |                   |       |      | C: 72.5% | C: 90%   |
| <i>IRGM</i>  | Rs4958847  | A/G                  |            | Allele "A": 48.7% | 98.6% | 0.40 | A: 9.2%  | A: 55%   |
|              |            | (ancestral allele G) |            |                   |       |      | G: 90.8% | G: 45%   |
| <i>IRGM</i>  | Rs13361189 | C/T                  |            | Allele "C": 45%   | 98.6% | 0.37 | C: 2.5%  | C: 53.3% |
|              |            | (ancestral allele C) |            |                   |       |      | T: 97.5% | T: 46.7% |
| <i>IRGM</i>  | Rs10065172 | C/T                  |            | Allele "T": 45.1% | 98.7% | 0.43 | C: 97.5% | C: 46.5% |
|              |            | (ancestral allele C) |            |                   |       |      | T: 2.5%  | T: 53.5% |

(SUPPLEMENTARY TABLE 3) Heterogeneity test between primary and secondary replicate dataset

| Marker        | primary dataset |           |      |      |         |         | secondary dataset |           |      |      |         |         | Q_test |  |
|---------------|-----------------|-----------|------|------|---------|---------|-------------------|-----------|------|------|---------|---------|--------|--|
|               | OR              | 95%CI     | P    | MAF  | D.ca/ct | d.ca/ct | OR                | 95%CI     | P    | MAF  | D.ca/ct | d.ca/ct | P      |  |
| NOD2_Cins     | -               | -         | 0.02 | 0.01 | 7/0     | 447/398 | 1.23              | 0.08-19.7 | 1.00 | 0.00 | 1/1     | 247/303 | 0.07   |  |
| NOD2.G908R_GC | 1.75            | 0.16-19.3 | 1.00 | 0.00 | 2/1     | 452/395 | 2.45              | 0.22-27.1 | 0.59 | 0.01 | 2/1     | 246/301 | 0.85   |  |
| NOD2.R702W_CT | 2.00            | 0.51-7.79 | 0.36 | 0.01 | 2/3     | 435/373 | 4.67              | 0.52-42.1 | 0.19 | 0.01 | 4/1     | 244/285 | 0.51   |  |
| NOD2.P268S_CT | 1.54            | 0.87-2.72 | 0.16 | 0.06 | 34/20   | 418/378 | 2.07              | 0.96-4.47 | 0.08 | 0.05 | 18/11   | 230/291 | 0.54   |  |
| NOD2.R708H_GA | 1.06            | 0.28-3.99 | 1.00 | 0.01 | 5/4     | 437/372 | 1.63              | 0.51-5.21 | 0.56 | 0.02 | 7/5     | 241/281 | 0.63   |  |
| NOD2.R790Q_GA | 0.98            | 0.46-2.09 | 1.00 | 0.03 | 15/13   | 427/363 | 1.07              | 0.50-2.33 | 1.00 | 0.05 | 13/14   | 235/272 | 0.87   |  |
| NOD2.A725G_CG | 1.20            | 0.61-2.36 | 0.61 | 0.04 | 21/15   | 421/361 | 0.56              | 0.22-1.42 | 0.27 | 0.04 | 7/14    | 241/272 | 0.19   |  |
| ATG16L_AG     | 1.47            | 1.10-1.96 | 0.01 | 0.32 | 163/110 | 291/288 | 1.34              | 0.94-1.92 | 0.12 | 0.33 | 89/90   | 155/210 | 0.70   |  |
| IBD5.OCTN1_CT | 1.23            | 0.76-2.00 | 0.46 | 0.09 | 43/31   | 411/365 | 1.82              | 1.02-3.23 | 0.04 | 0.10 | 31/22   | 217/280 | 0.31   |  |
| IBD5.OCTN2_GC | 1.38            | 1.05-1.83 | 0.02 | 0.39 | 191/137 | 261/259 | 1.10              | 0.78-1.56 | 0.59 | 0.38 | 98/108  | 150/182 | 0.32   |  |
| IGR2230_GA    | 1.14            | 0.81-1.62 | 0.48 | 0.19 | 88/69   | 358/321 | 1.41              | 0.94-2.10 | 0.10 | 0.23 | 64/60   | 182/240 | 0.44   |  |
| IGR2198_CG    | 1.29            | 0.82-2.02 | 0.31 | 0.11 | 52/36   | 390/348 | 1.39              | 0.88-2.21 | 0.19 | 0.16 | 45/41   | 201/255 | 0.81   |  |
| IGR2096_GT    | 1.14            | 0.73-1.76 | 0.58 | 0.11 | 52/40   | 394/344 | 1.63              | 1.03-2.57 | 0.04 | 0.16 | 50/40   | 198/258 | 0.26   |  |
| IL23_rs751_GT | 1.02            | 0.73-1.42 | 0.93 | 0.20 | 93/80   | 361/316 | 0.85              | 0.56-1.28 | 0.47 | 0.22 | 49/70   | 193/234 | 0.50   |  |
| IL23_rs220_AG | 1.34            | 0.92-1.96 | 0.13 | 0.16 | 78/54   | 370/344 | 1.49              | 0.95-2.34 | 0.10 | 0.16 | 47/43   | 193/263 | 0.73   |  |
| IL23_rs112_GA | 1.10            | 0.29-4.13 | 1.00 | 0.01 | 5/4     | 447/395 | 0.80              | 0.34-1.88 | 0.67 | 0.04 | 9/14    | 233/290 | 0.69   |  |
| IL23_rs149_TC | 1.18            | 0.89-1.54 | 0.27 | 0.45 | 207/168 | 239/228 | 0.94              | 0.67-1.32 | 0.73 | 0.47 | 112/145 | 132/161 | 0.32   |  |
| IL23_rs108_CA | 1.36            | 0.94-1.99 | 0.11 | 0.16 | 79/64   | 369/344 | 1.05              | 0.67-1.66 | 0.91 | 0.17 | 41/49   | 201/253 | 0.39   |  |
| IRGM_rs495_GA | 0.88            | 0.67-1.16 | 0.37 | 0.47 | 204/192 | 248/206 | 0.93              | 0.66-1.30 | 0.67 | 0.50 | 119/153 | 125/149 | 0.82   |  |
| IRGM_rs133_TC | 0.94            | 0.72-1.23 | 0.68 | 0.44 | 197/178 | 257/218 | 1.05              | 0.75-1.47 | 0.80 | 0.46 | 112/137 | 130/167 | 0.61   |  |
| IRGM_rs100_CT | 0.91            | 0.69-1.20 | 0.53 | 0.44 | 194/179 | 258/217 | 1.02              | 0.73-1.43 | 0.93 | 0.45 | 112/137 | 134/167 | 0.64   |  |

**MAF, minor allele frequency; D.ca/ct, minor allele cases/controls; d.ca/ct, major allele cases/controls**

Heterogeneity was assessed by Q statistic. Cochran WG. The combination of estimates from different experiment. Biometrics 1954;10:101-29.

**(SUPPLEMENTARY TABLE 4) Association of SNPs among 227 CD and 200 controls in primary dataset**

| Candidate Gene                                                             | SNP no.                        | 0 copy of variant allele |          | 1 copy of variant allele |                              | 2 copies of variant allele |                             | Carrier OR (95%CI) P value   | MAF case/control | Minor Allele test OR (95%CI) P value |
|----------------------------------------------------------------------------|--------------------------------|--------------------------|----------|--------------------------|------------------------------|----------------------------|-----------------------------|------------------------------|------------------|--------------------------------------|
|                                                                            |                                | Case /control            | OR (ref) | Case /control            | OR (95%CI) p value           | Case /control              | OR (95%CI) P value          |                              |                  |                                      |
| <i>NOD2</i><br><i>C_insertion</i>                                          | Rs2066847<br>1007fs<br>(SNP13) | 220/199                  | 1.0      | 7/0                      | 8.63<br>(1.28--)<br>0.02     | 0/0                        | --                          | 8.63<br>(1.28--)<br>0.02     | 1.54% /<br>0%    | --                                   |
| <i>NOD2</i><br>(G->C, variant C)                                           | Rs2066845<br>G908R<br>(SNP12)  | 225/197                  | 1.0      | 2/1                      | 1.75<br>(0.16-19.5)<br>1.00  | 0/0                        | --                          | 1.75<br>(0.16-19.5)<br>1.0   | 0.44% /<br>0.25% | 1.75<br>(0.16-19.3)<br>1.0           |
| <i>NOD2</i><br>(C->T, variant T)                                           | Rs2066844<br>R702W<br>(SNP8)   | 214/183                  | 1.0      | 7/3                      | 2.00<br>(0.51-7.83)<br>0.32  | 0/0                        | --                          | 1.99<br>(0.51-7.83)<br>0.36  | 1.58% /<br>0.81% | 1.98<br>(0.51-7.71)<br>0.36          |
| <i>NOD2</i><br>(C->T, variant T)                                           | Rs2066842<br>P268S<br>(SNP5)   | 196/179                  | 1.0      | 26/20                    | 1.19<br>(0.64-2.20)<br>0.58  | 4/0                        | 4.79<br>(0.59--)            | 1.37<br>(0.75-2.50)<br>0.37  | 7.52% /<br>5.03% | 1.54<br>(0.87-2.72)<br>0.16          |
| <i>NOD2</i><br>(G->A, variant A)                                           | rs35285618<br>R708H            | 216/182                  | 1.0      | 5/4                      | 1.05<br>(0.28-3.98)<br>1.00  | 0/0                        | --                          | 1.05<br>(0.28-3.98)<br>1.0   | 1.13% /<br>1.07% | 1.05<br>(0.28-3.95)<br>1.0           |
| <i>NOD2</i><br>(G->A, variant A)                                           | rs5743279<br>R790Q             | 206/172                  | 1.0      | 15/12                    | 1.04<br>(0.48-2.29)<br>1.00  | 0/0                        | --                          | 1.04<br>(0.48-2.29)<br>1.0   | 3.39% /<br>3.26% | 1.04<br>(0.48-2.26)<br>1.0           |
| <i>NOD2</i><br>(C->G, variant G)                                           | rs5743278<br>A725G             | 201/172                  | 1.0      | 19/15                    | 1.08<br>(0.53-2.20)<br>0.82  | 1/0                        | 0.85<br>(0.02--)            | 1.14<br>(0.57-2.29)<br>0.73  | 4.75% /<br>4.01% | 1.19<br>(0.61-2.35)<br>0.74          |
| <i>ATG16L1</i><br>(A->G, variant G)                                        | Rs2241880<br>Thr300Ala         | 91/108                   | 1.0      | 109/72                   | 1.80<br>(1.19-2.70)<br>0.005 | 27/19                      | 1.69<br>(0.88-3.23)<br>0.11 | 1.77<br>(1.21-2.61)<br>0.004 | 35.9% /<br>27.6% | 1.47<br>(1.10-1.96)<br>0.01          |
| <i>IBD5_OCTN1</i><br><i>SLC22A4</i><br>(C->T, variant T)                   | Rs1050152<br>Leu503Phe         | 190/167                  | 1.0      | 31/31                    | 0.88<br>(0.51-1.51)<br>0.64  | 6/0                        | 7.12<br>(1.02--)            | 1.05<br>(0.62-1.77)<br>0.90  | 9.47% /<br>7.83% | 1.23<br>(0.76-2.00)<br>0.46          |
| <i>IBD5_OCTN2</i><br><i>SLC22A5</i><br>(G->C, variant C)                   | Rs2631367                      | 79/82                    | 1.0      | 103/95                   | 1.13<br>(0.74-1.71)<br>0.58  | 44/21                      | 2.17<br>(1.19-3.98)<br>0.01 | 1.32<br>(0.89-1.95)<br>0.19  | 42.2% /<br>34.6% | 1.38<br>(1.05-1.82)<br>0.02          |
| <i>IBD5_OCTN2</i><br><i>SLC22A5</i><br><i>IGR2230</i><br>(G->A, variant A) | Rs17622208                     | 145/128                  | 1.0      | 68/65                    | 0.92<br>(0.61-1.40)<br>0.71  | 10/2                       | 4.40<br>(0.91-41.9)<br>0.07 | 1.03<br>(0.69-1.54)<br>0.92  | 19.7% /<br>17.7% | 1.14<br>(0.81-1.62)<br>0.48          |
| <i>IBD5_IGR2198</i><br>(C->G, variant G)                                   | Rs11739135                     | 177/156                  | 1.0      | 36/36                    | 0.88<br>(0.53-1.47)<br>0.63  | 8/0                        | 9.65<br>(1.47--)            | 1.08<br>(0.66-1.76)<br>0.80  | 11.7% /<br>9.37% | 1.29<br>(0.82-2.02)<br>0.31          |
| <i>IBD5_IGR2096</i>                                                        | Rs12521868                     | 178/152                  | 1.0      | 38/40                    | 0.81                         | 7/0                        | 8.13                        | 0.96                         | 11.7% /          | 1.14                                 |

|                             |            |         |     |         |             |       |             |             |         |             |
|-----------------------------|------------|---------|-----|---------|-------------|-------|-------------|-------------|---------|-------------|
| <i>(G-&gt;T, variant T)</i> |            |         |     |         | (0.50-1.33) |       | (1.21--)    | (0.60-1.55) | 10.4%   | (0.73-1.76) |
|                             |            |         |     |         | 0.41        |       | 0.03        | 0.90        |         | 0.58        |
| <i>IL23R</i>                | Rs7517847  | 145/123 | 1.0 | 71/70   | 0.86        | 11/5  | 1.87        | 0.93        | 20.5% / | 1.02        |
| <i>(T-&gt;G, variant G)</i> |            |         |     |         | (0.57-1.29) |       | (0.63-5.52) | (0.62-1.38) | 20.2%   | (0.73-1.42) |
|                             |            |         |     |         | 0.47        |       | 0.26        | 0.76        |         | 0.93        |
| <i>IL23R</i>                | Rs2201841  | 151/149 | 1.0 | 68/46   | 1.46        | 5/4   | 1.23        | 1.44        | 17.4% / | 1.34        |
| <i>(A-&gt;G, variant G)</i> |            |         |     |         | (0.94-2.26) |       | (0.33-4.68) | (0.94-2.20) | 13.6%   | (0.92-1.96) |
|                             |            |         |     |         | 0.09        |       | 0.76        | 0.11        |         | 0.13        |
| <i>IL23R</i>                | Rs11209026 | 221/195 | 1.0 | 5/4     | 1.10        | 0/0   | --          | 1.10        | 1.11% / | 1.10        |
| <i>(G-&gt;A, variant A)</i> |            |         |     |         | (0.29-4.17) |       |             | (0.29-4.17) | 1.01%   | (0.29-4.13) |
|                             | Arg381Gln  |         |     |         | 0.89        |       |             | 0.89        |         | 1.0         |
| <i>IL23R</i>                | Rs1495965  | 63/64   | 1.0 | 113/100 | 1.15        | 47/34 | 1.40        | 1.21        | 46.4% / | 1.17        |
| <i>(T-&gt;C, variant C)</i> |            |         |     |         | (0.74-1.78) |       | (0.80-2.46) | (0.80-1.84) | 42.4%   | (0.89-1.54) |
|                             |            |         |     |         | 0.54        |       | 0.24        | 0.36        |         | 0.26        |
| <i>IL23R</i>                | Rs10889677 | 150/149 | 1.0 | 69/46   | 1.49        | 5/4   | 1.24        | 1.47        | 17.6% / | 1.36        |
| <i>(C-&gt;A, variant A)</i> |            |         |     |         | (0.96-2.31) |       | (0.33-4.71) | (0.96-2.25) | 13.5%   | (0.94-1.99) |
|                             |            |         |     |         | 0.07        |       | 0.75        | 0.09        |         | 0.11        |
| <i>IRGM</i>                 | Rs4958847  | 53/47   | 1.0 | 98/98   | 0.89        | 75/54 | 1.23        | 1.00        | 45.1% / | 0.88        |
| <i>(A-&gt;G, variant G)</i> |            |         |     |         | (0.55-1.44) |       | (0.73-2.08) | (0.64-1.58) | 48.2%   | (0.67-1.15) |
|                             |            |         |     |         | 0.62        |       | 0.44        | 0.97        |         | 0.37        |
| <i>IRGM</i>                 | Rs13361189 | 45/39   | 1.0 | 107/100 | 0.93        | 75/59 | 1.10        | 0.99        | 43.4% / | 0.93        |
| <i>(C-&gt;T, variant T)</i> |            |         |     |         | (0.56-1.54) |       | (0.64-1.91) | (0.62-1.60) | 44.9%   | (0.71-1.23) |
|                             |            |         |     |         | 0.77        |       | 0.73        | 0.97        |         | 0.67        |
| <i>IRGM</i>                 | Rs10065172 | 76/58   | 1.0 | 106/101 | 0.80        | 44/39 | 0.86        | 0.82        | 42.9% / | 0.91        |
| <i>(C-&gt;T, variant T)</i> |            |         |     |         | (0.52-1.24) |       | (0.50-1.49) | (0.54-1.24) | 45.2%   | (0.69-1.19) |
|                             |            |         |     |         | 0.32        |       | 0.59        | 0.34        |         | 0.53        |

**(SUPPLEMENTARY TABLE 5) Diplotype association test for *IBD5***

| <u>diplotype:</u> | <u>freq.case</u> | <u>freq.ctrl</u> | <u>OR</u>  | <u>95%CI</u>    | <u>P value</u> |
|-------------------|------------------|------------------|------------|-----------------|----------------|
| CGGCG/CGGCG       | 0.33             | 0.35             | 1.00 (ref) | -               | -              |
| CGGCG/CCGCG       | 0.23             | 0.26             | 0.91       | 0.60-1.37       | 0.7            |
| CGGCG/TCAGT       | 0.09             | 0.11             | 0.93       | 0.52-1.64       | 0.88           |
| CGGCG/CCACG       | 0.10             | 0.10             | 0.98       | 0.54-1.76       | 1              |
| CCGCG/CCGCG       | 0.05             | 0.03             | 1.47       | 0.61-3.65       | 0.47           |
| CCGCG/CCACG       | 0.04             | 0.02             | 2.42       | 0.76-9.03       | 0.16           |
| CGGCG/CGAGT       | 0.01             | 0.05             | 0.25       | 0.03-1.31       | 0.12           |
| CGAGT/CCGCG       | 0.00             | 0.02             | 0.42       | 0-5.46          | 0.51           |
| CCGCG/TCAGT       | 0.04             | 0.03             | 1.41       | 0.56-3.70       | 0.56           |
| CGGCG/TCAGT       | 0.01             | 0.00             | 3.02       | 0.24-160        | 0.63           |
| TCAGT/TCAGT       | 0.02             | 0.00             | 8.14       | 1.16 - $\infty$ | 0.03           |
| CCACG/TCAGT       | 0.02             | 0.01             | 3.02       | 0.53-31         | 0.3            |
| CCGCG/CCAGT       | 0.01             | 0.00             | 5.27       | 0.65 - $\infty$ | 0.13           |
| CCACG/CCACG       | 0.00             | 0.01             | 0.34       | 0.006-4.28      | 0.64           |
| CGAGT/CGAGT       | 0.00             | 0.01             | 0.51       | 0.008-9.8       | 1              |

Diplotype association used PHASE Bayesian approach and partition-ligation algorithm to reconstruct haplotypes and estimate diplotype probabilities for CD and HC, separately. (Stephens M, Smith NJ, Donnelly P. A new statistical method for haplotype reconstruction from population data. *Am J Hum Genet* 2001;68:978-89.) In the regression model, (CD served as the dependent variables, and the diplotype probabilities served as continuous variables.

**(SUPPLEMENTARY TABLE 6)**

Power calculation: Sample size 354 cases and 1:1 control; CD Population risk: 50/100,000; 2-sided p value 0.05;

|                               | <b>Allele freq in present study data and OR estimates from prior and present studies</b> | <b>Power Estimate</b> |
|-------------------------------|------------------------------------------------------------------------------------------|-----------------------|
| <i>NOD2</i> any mutant        | Allele freq 1.03% in study AA HCs                                                        |                       |
|                               | OR 3.2 (whites) <sup>38</sup> , log. additive mode                                       | 83%                   |
|                               | OR 3.3 (present data), log. additive mode                                                | 86%                   |
| <i>SLC22A4</i><br>(variant C) | Allele freq 7.6% in study AA HCs                                                         |                       |
|                               | OR 1.7 (white) <sup>30</sup> dominant mode                                               | 78%                   |
|                               | OR 8.4 (present data), recessive mode                                                    | 95%                   |
| <i>SLC22A5</i><br>(variant C) | Allele freq 35.7% in study AA HCs                                                        |                       |
|                               | OR 2.0 (white) <sup>30</sup> , dominant mode                                             | 99%                   |
|                               | OR 1.9 (present data), recessive mode                                                    | 87%                   |
| ATG16L1                       | Allele freq 29.3% in study AA HCs                                                        |                       |
|                               | OR 2.0 (white) <sup>30</sup> , dominant mode                                             | 99%                   |
|                               | OR 1.4 (present data), dominant mode                                                     | 62%                   |
| <i>IL23R</i> rs2201841        | Allele freq 13.8% in study AA HCs                                                        |                       |
|                               | OR 2.2 (white) <sup>30</sup> , dominant mode                                             | 99%                   |
|                               | OR 1.3 (present data), dominant mode                                                     | 35%                   |
| <i>IRGM</i> rs13361189        | Allele freq 45% in study AA HCs                                                          |                       |
|                               | OR 1.4 - 1.6 (white) <sup>19</sup> , dominant mode*                                      | 51 - 78%              |

\*Taken from allelic OR. Data for mode of inheritance not available. Dominant mode assumed over additive mode as more conservative. OR from Ref 19 was 1.6, a slightly larger cohort than the Wellcome Trust discovery cohort (allelic OR of 1.4). *IRGM* power estimates are not given from present study data as OR was 0.98 (Table 2).
